# Supplementary material
Source: MDPI journal article supplement (https://www.mdpi.com/2073-4395/11/6/1194)
Supplement: s1 [file s1]

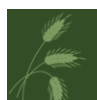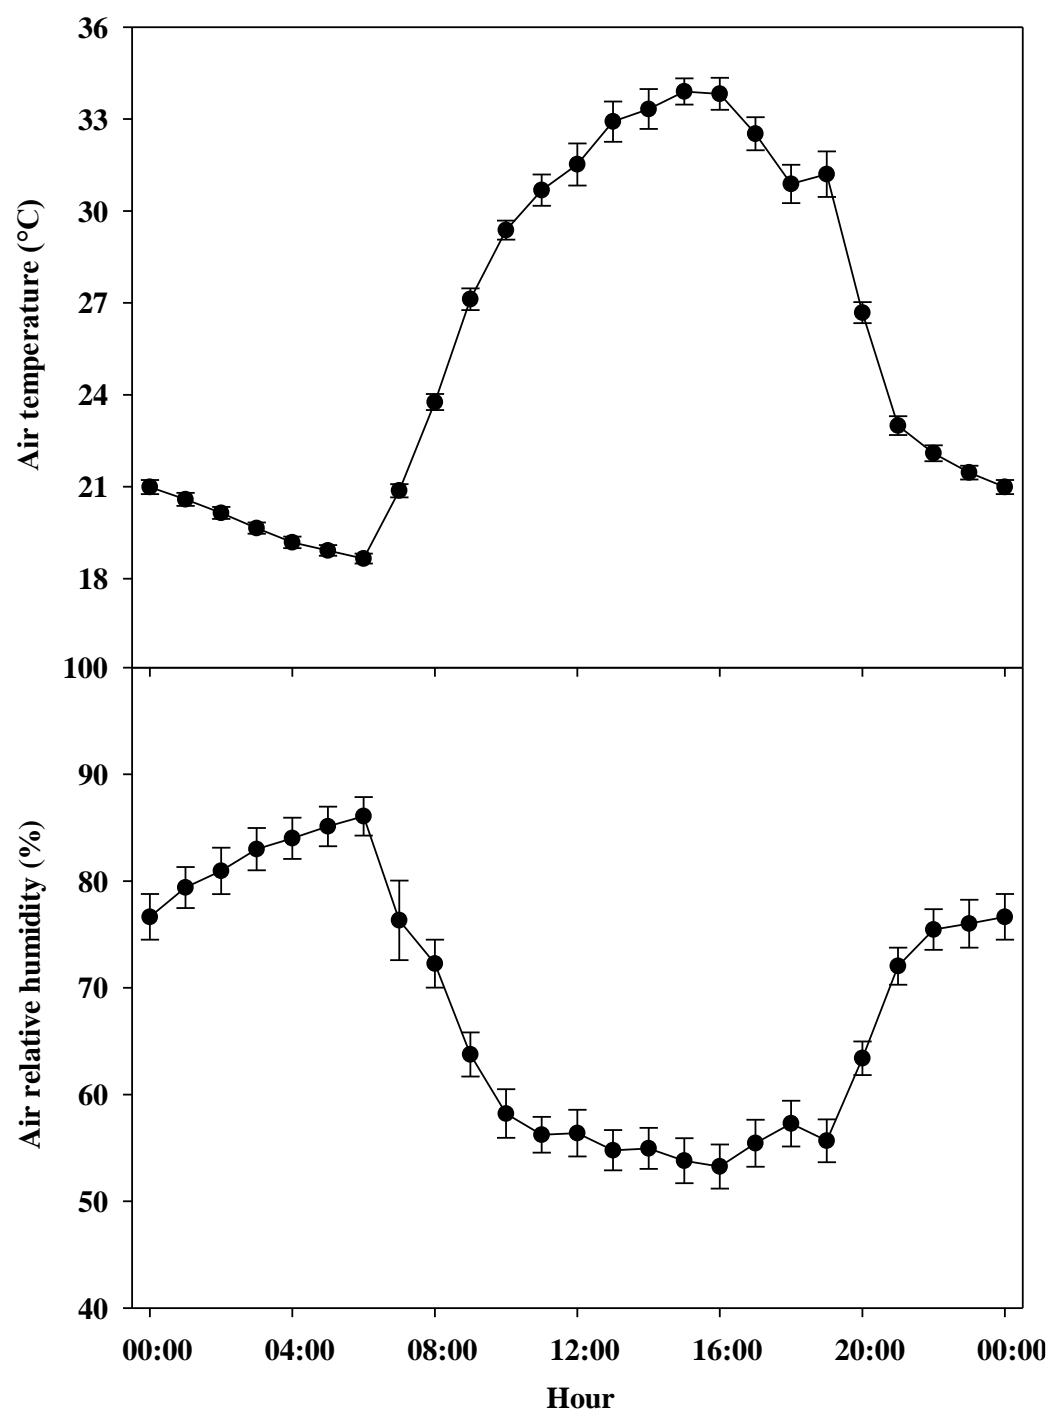

**Figure S1.** Hourly average air temperature and air relative humidity values recorded throughout the lettuce crop cycle.

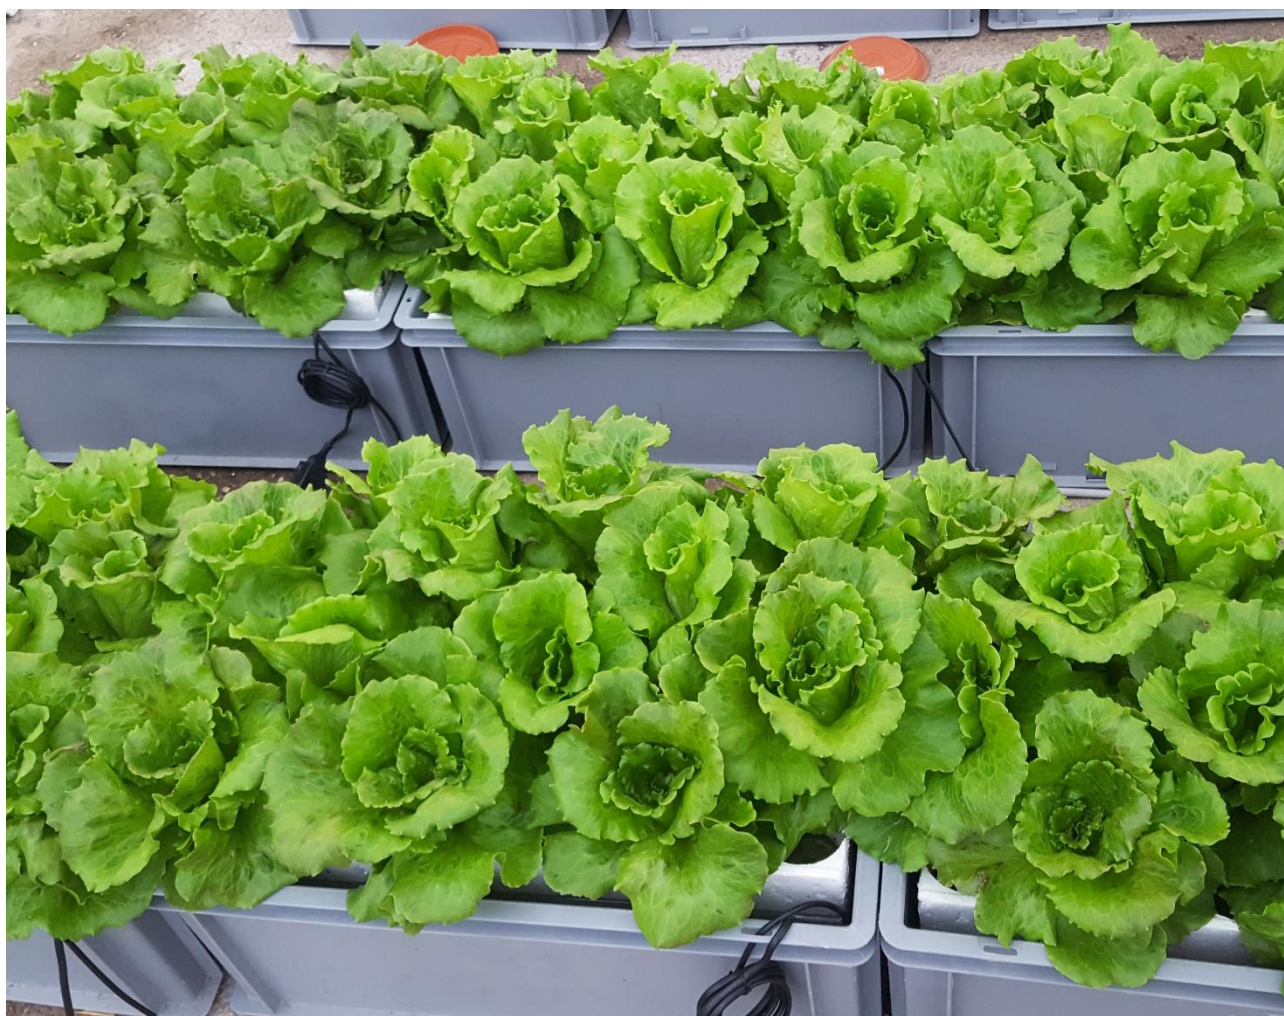

**Figure S2.** Depiction of the experimental unit adopted for the trial.
